# Supplementary material for: Changes in Microbial (Bacteria and Archaea) Plankton Community Structure after Artificial Dispersal in Grazer-Free Microcosms
Source: MDPI journal article supplement (doi:10.3390/microorganisms5020031), 2017-06-03
Supplement: s1 [file FigureS1.docx]

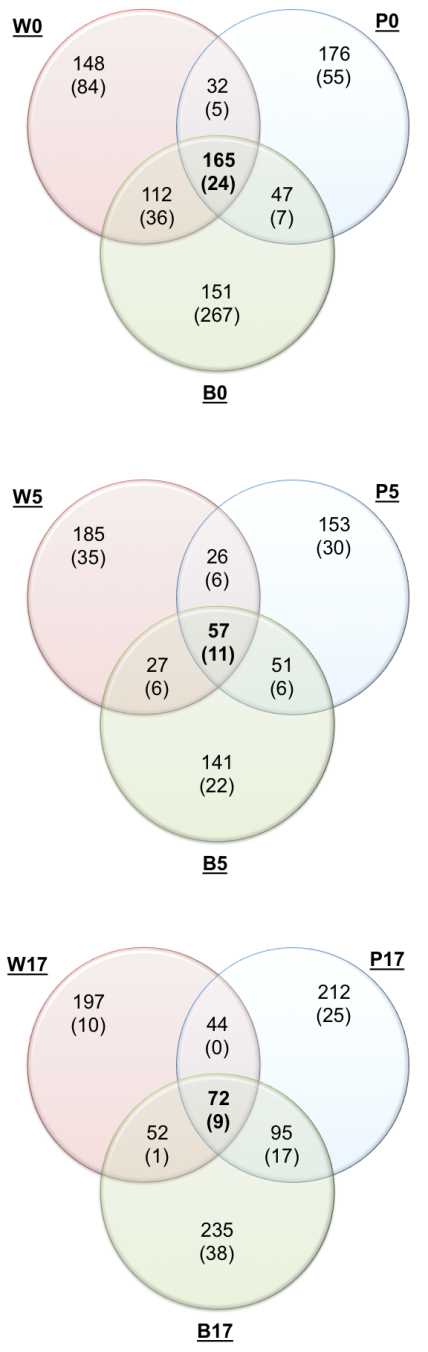


**Figure S1.** Venn Diagram at distance 0.03, illustrating the number of unique and shared bacterial and archaeal (in parenthesis) OTUs (97% sequence similarity) among Banyuls (B), Woods Hole (W) and Pagasitikos (P) microcosms at d0 (top), d5 (middle) and d17 (bottom).
