# Supplementary material for: Changes in Microbial (Bacteria and Archaea) Plankton Community Structure after Artificial Dispersal in Grazer-Free Microcosms
Source: MDPI journal article supplement (doi:10.3390/microorganisms5020031), 2017-06-03
Supplement: s1 [file TableS1.xlsx]

## Sheet: Sheet1
Table S1. Bacteria (cumulative >70%) and Archaea (cumulative >80%) OTUs and families/phyla relative abundance . Bold: dominant OTUs
Otu/Family	B0	B5	Β17	P0	P5	P17	W0	W5	W17	Taxonomic affiliation
Otu0001	12.8	41.9	20.9	1.9		10.4	8.1		3.8	Bacteria(100);"Bacteroidetes"(100);Flavobacteria(100);"Flavobacteriales"(100);Flavobacteriaceae(100);unclassified(100);
Otu0002				18.1	47.4	12.3		1.5	5.3	Bacteria(100);"Proteobacteria"(100);Alphaproteobacteria(100);Rhodobacterales(100);Rhodobacteraceae(100);unclassified(100);
Otu0003	29.3	3.7	14.1			2.4	19.0			Bacteria(100);"Proteobacteria"(100);Gammaproteobacteria(100);Alteromonadales(100);Alteromonadaceae(100);unclassified(100);
Otu0004	14.9			5.1			22.0			Bacteria(100);unclassified(100);unclassified(100);unclassified(100);unclassified(100);unclassified(100);
Otu0005	2.5	18.9	0.0258832	4.6			6.2			Bacteria(100);"Bacteroidetes"(100);unclassified(100);unclassified(100);unclassified(100);unclassified(100);
Otu0006		4.6		21.7			1.9			Bacteria(100);"Bacteroidetes"(100);Flavobacteria(100);"Flavobacteriales"(100);unclassified(100);unclassified(100);
Otu0007	3.3	16.5	1.8				6.9			Bacteria(100);"Bacteroidetes"(100);Flavobacteria(100);"Flavobacteriales"(100);Flavobacteriaceae(100);Polaribacter(100);
Otu0008				1.2	17.5	8.5				Bacteria(100);"Bacteroidetes"(100);Flavobacteria(100);"Flavobacteriales"(100);Flavobacteriaceae(100);Tenacibaculum(100);
Otu0009								19.4	11.0	Bacteria(100);"Proteobacteria"(100);Alphaproteobacteria(100);Rhodobacterales(100);Rhodobacteraceae(100);Nereida(100);
Otu0010			0.7	11.9	7.9	0.9				Bacteria(100);"Proteobacteria"(100);Gammaproteobacteria(100);unclassified(100);unclassified(100);unclassified(100);
Otu0011	6.4			1.6			4.0			Bacteria(100);"Proteobacteria"(100);Gammaproteobacteria(100);Alteromonadales(100);Alteromonadaceae(100);Glaciecola(100);
Otu0012	1.9			8.9			1.1			Bacteria(100);"Proteobacteria"(100);Gammaproteobacteria(100);Alteromonadales(100);Pseudoalteromonadaceae(100);Pseudoalteromonas(100);
Otu0013			5.9			3.7		1.3	1.2	Bacteria(100);"Bacteroidetes"(100);Flavobacteria(100);"Flavobacteriales"(100);Flavobacteriaceae(100);Winogradskyella(100);
Otu0014						14.5				Bacteria(100);"Proteobacteria"(100);unclassified(100);unclassified(100);unclassified(100);unclassified(100);
Otu0015			0.9			2.0			19.9	Bacteria(100);"Proteobacteria"(100);Gammaproteobacteria(100);Alteromonadales(100);Colwelliaceae(100);Colwellia(100);
Otu0016			1.4				4.4			Bacteria(100);"Proteobacteria"(100);Gammaproteobacteria(100);Thiotrichales(100);Piscirickettsiaceae(100);Methylophaga(100);
Otu0017								9.8	11.9	Bacteria(100);"Proteobacteria"(100);Alphaproteobacteria(100);Rhodobacterales(100);Rhodobacteraceae(100);Sulfitobacter(100);
Otu0018			2.1	0.0485865					1.3	Bacteria(100);"Proteobacteria"(100);Gammaproteobacteria(100);Alteromonadales(100);Alteromonadaceae(100);Alteromonas(100);
Otu0019	3.0			2.1			1.6			Bacteria(100);"Proteobacteria"(100);Betaproteobacteria(100);unclassified(100);unclassified(100);unclassified(100);
Otu0020								3.0	11.7	Bacteria(100);"Proteobacteria"(100);Alphaproteobacteria(100);Rhodobacterales(100);Rhodobacteraceae(100);Phaeobacter(100);
Otu0021				2.8		1.8		2.3	1.9	Bacteria(100);"Bacteroidetes"(100);"Sphingobacteria"(100);"Sphingobacteriales"(100);Chitinophagaceae(100);unclassified(100);
Otu0022			2.5					2.6	3.0	Bacteria(100);"Proteobacteria"(100);Gammaproteobacteria(100);"Vibrionales"(100);Vibrionaceae(100);Vibrio(100);
Otu0023						6.4				Bacteria(100);"Proteobacteria"(100);Gammaproteobacteria(100);Oceanospirillales(100);Oceanospirillaceae(100);Marinomonas(100);
Otu0024	1.8						1.4			Bacteria(100);"Actinobacteria"(100);Actinobacteria(100);Actinomycetales(100);Microbacteriaceae(100);unclassified(100);
Otu0025				3.7						Bacteria(100);"Proteobacteria"(100);Gammaproteobacteria(100);Pseudomonadales(100);Pseudomonadaceae(100);Pseudomonas(100);
Otu0026								4.5		Bacteria(100);"Proteobacteria"(100);Alphaproteobacteria(100);Rhodobacterales(100);Rhodobacteraceae(100);Pelagicola(100);
Otu0027							2.3			Bacteria(100);"Proteobacteria"(100);Gammaproteobacteria(100);Oceanospirillales(100);Litoricolaceae(100);Litoricola(100);
Otu0028	1.8									Bacteria(100);"Proteobacteria"(100);Gammaproteobacteria(100);Alteromonadales(100);unclassified(100);unclassified(100);
Otu0029			5.4					1.4		Bacteria(100);"Bacteroidetes"(100);Flavobacteria(100);"Flavobacteriales"(100);Flavobacteriaceae(100);Krokinobacter(100);
Otu0030	1.5		1.0							Bacteria(100);"Actinobacteria"(100);Actinobacteria(100);Actinomycetales(100);unclassified(100);unclassified(100);
Otu0031						1.0				Bacteria(100);"Proteobacteria"(100);Gammaproteobacteria(100);Oceanospirillales(100);Oceanospirillaceae(100);Oleispira(100);
Otu0032							1.4			Bacteria(100);"Verrucomicrobia"(100);Opitutae(100);unclassified(100);unclassified(100);unclassified(100);
Otu0033						4.3				Bacteria(100);"Proteobacteria"(100);Alphaproteobacteria(100);unclassified(100);unclassified(100);unclassified(100);
Otu0034			5.7							Bacteria(100);"Proteobacteria"(100);Epsilonproteobacteria(100);Campylobacterales(100);Campylobacteraceae(100);Arcobacter(100);
Otu0037	1.5									Bacteria(100);"Proteobacteria"(100);Betaproteobacteria(100);Burkholderiales(100);Burkholderiaceae(100);Limnobacter(100);
Otu0039						3.1				Bacteria(100);"Proteobacteria"(100);Alphaproteobacteria(100);Rhodobacterales(100);Rhodobacteraceae(100);Pacificibacter(100);
Otu0040						2.6				Bacteria(100);"Proteobacteria"(100);Alphaproteobacteria(100);Sneathiellales(100);Sneathiellaceae(100);Sneathiella(100);
Otu0041			4.4							Bacteria(100);"Verrucomicrobia"(100);Verrucomicrobiae(100);Verrucomicrobiales(100);unclassified(100);unclassified(100);
Otu0042									1.3	Bacteria(100);"Proteobacteria"(100);Gammaproteobacteria(100);Oceanospirillales(100);Oceanospirillaceae(100);Neptuniibacter(100);
Otu0045								2.3		Bacteria(100);"Bacteroidetes"(100);Flavobacteria(100);"Flavobacteriales"(100);Flavobacteriaceae(100);Olleya(100);
Otu0047			3.7							Bacteria(100);"Verrucomicrobia"(100);Opitutae(100);Puniceicoccales(100);Puniceicoccaceae(100);Coraliomargarita(100);
Otu0051									2.4	Bacteria(100);"Proteobacteria"(100);Gammaproteobacteria(100);Oceanospirillales(100);Alcanivoracaceae(100);Alcanivorax(100);
Otu0053			0.6							Bacteria(100);"Proteobacteria"(100);Gammaproteobacteria(100);Oceanospirillales(100);Oceanospirillaceae(100);Reinekea(100);
Otu0055						1.2				Bacteria(100);"Verrucomicrobia"(100);Opitutae(100);Puniceicoccales(100);Puniceicoccaceae(100);unclassified(100);
Otu0056						1.7				Bacteria(100);"Bacteroidetes"(100);Flavobacteria(100);"Flavobacteriales"(100);Flavobacteriaceae(100);Kordia(100);
Otu0059			1.8							Bacteria(100);"Proteobacteria"(100);Alphaproteobacteria(100);Rhodobacterales(100);Rhodobacteraceae(100);Thalassobacter(100);
Otu0060						1.1				Bacteria(100);"Proteobacteria"(100);Alphaproteobacteria(100);Sphingomonadales(100);Sphingomonadaceae(100);Sphingopyxis(100);
Otu0062									0.8	Bacteria(100);"Proteobacteria"(100);Gammaproteobacteria(100);Alteromonadales(100);Alteromonadaceae(100);Haliea(100);
Otu0063									1.4	Bacteria(100);Cyanobacteria_Chloroplast(100);Cyanobacteria(100);Cyanobacteria_order_incertae_sedis(100);Family_II(100);GpIIa(100);
Otu0067			1.1							Bacteria(100);"Proteobacteria"(100);Betaproteobacteria(100);Burkholderiales(100);Burkholderiaceae(100);Ralstonia(100);
Otu0071						1.1				Bacteria(100);"Actinobacteria"(100);Actinobacteria(100);Actinomycetales(100);Propionibacteriaceae(100);Propionibacterium(100);
Otu0075									1.0	Bacteria(100);"Proteobacteria"(100);Gammaproteobacteria(100);Oceanospirillales(100);Oceanospirillales_incertae_sedis(100);Spongiispira(100);
Otu0076									1.5	Bacteria(100);"Proteobacteria"(100);Alphaproteobacteria(100);Rhodobacterales(100);Rhodobacteraceae(100);Ruegeria(100);
Otu0077						1.0				Bacteria(100);"Proteobacteria"(100);Betaproteobacteria(100);Neisseriales(100);Neisseriaceae(100);unclassified(100);
Otu0097									0.9	Bacteria(100);"Proteobacteria"(100);Alphaproteobacteria(100);Caulobacterales(100);Hyphomonadaceae(100);unclassified(100);
Otu0106										Bacteria(100);"Bacteroidetes"(100);Flavobacteria(100);"Flavobacteriales"(100);Flavobacteriaceae(100);Zeaxanthinibacter(100);
Otu0107			0.9							Bacteria(100);"Proteobacteria"(100);Betaproteobacteria(100);Burkholderiales(100);Comamonadaceae(100);Albidiferax(100);
Otu0108										Bacteria(100);Firmicutes(100);Bacilli(100);Bacillales(100);Staphylococcaceae(100);Staphylococcus(100);
Otu0109			0.8							Bacteria(100);"Proteobacteria"(100);Alphaproteobacteria(100);Rhodobacterales(100);Rhodobacteraceae(100);Seohaeicola(100);
Otu0112									0.8	Bacteria(100);"Actinobacteria"(100);Actinobacteria(100);Acidimicrobiales(100);Acidimicrobiaceae(100);Ilumatobacter(100);
Otu0113			0.9							Bacteria(100);"Bacteroidetes"(100);"Sphingobacteria"(100);"Sphingobacteriales"(100);"Cyclobacteriaceae"(100);Aquiflexum(100);
Flavobacteriaceae	26(3)	44(12)	29(15)	28(4)	72(1)	64(13)	22(6)	44(22)	46(26)
Rhodobacteraceae	32(11)	9(3)	38(9)	20(7)	17(7)	18(13)	19(15)	26(8)	25(21)
Alteromonadaceae	8(4)	44(8)	15(8)	29(4)	9(5)	3(2)	10(15)	26(18)	23(8)
ArOtu0001	27.9			22.8			0.378			Archaea(100);"Euryarchaeota"(100);unclassified(100);unclassified(100);unclassified(100);unclassified(100);
ArOtu0002	33.6			21.6			0.152			unknown(69);unclassified(69);unclassified(69);unclassified(69);unclassified(69);unclassified(69);
ArOtu0003		15.5	11.8	2.3	16.3	8.9		10.5	16.4	Archaea(100);"Euryarchaeota"(100);"Methanomicrobia"(100);Methanosarcinales(100);unclassified(100);unclassified(100);
ArOtu0004	8.7			14.8			18.6			Archaea(100);"Euryarchaeota"(100);unclassified(100);unclassified(100);unclassified(100);unclassified(100);
ArOtu0005	3.8			1.1						Archaea(100);"Euryarchaeota"(100);"Methanomicrobia"(100);unclassified(100);unclassified(100);unclassified(100);
ArOtu0006	3.6			4.2			4.1			unknown(100);unclassified(100);unclassified(100);unclassified(100);unclassified(100);unclassified(100);
ArOtu0007	3.8	72.4	71.4	7.6	74.3	71.4		78.0	52.2	Archaea(100);"Euryarchaeota"(100);"Methanomicrobia"(100);Methanosarcinales(100);Methanosarcinaceae(100);unclassified(100);
ArOtu0008							7.7			Archaea(100);"Euryarchaeota"(100);unclassified(100);unclassified(100);unclassified(100);unclassified(100);
ArOtu0014				1.3						Archaea(100);"Euryarchaeota"(100);unclassified(100);unclassified(100);unclassified(100);unclassified(100);
ArOtu0017				1.1						Archaea(100);"Euryarchaeota"(100);"Methanomicrobia"(100);Methanosarcinales(100);Methanosarcinaceae(100);unclassified(100);
ArOtu0018				1.9						unknown(69);unclassified(68);unclassified(68);unclassified(68);unclassified(68);unclassified(68);
ArOtu0023				1.3						Archaea(100);unclassified(100);unclassified(100);unclassified(100);unclassified(100);unclassified(100);
ArOtu0821									15.6	Archaea(100);"Crenarchaeota"(100);Thermoprotei(100);unclassified(100);unclassified(100);unclassified(100);
Euryarchaeota (Methanomicrobia)	10(7)	90(7)	93(3)	12(7)	87(13)	89(17)	6(3)	96(1)	76(29)
Euryarchaeota (Unclassified)	43(8)	3(1)	5(2)	47(14)	4(3)	6(5)	54(29)	3(2)	3(4)
Crenarchaeota	<1	<1	<1	<1	<1	<1	<1	<1	15
